# Supplementary material for: Exosomes in the nose induce immune cell trafficking and harbour an altered protein cargo in chronic airway inflammation
Source: Springer Nature journal article supplement (doi:10.1186/s12967-016-0927-4), 2016-06-17
Supplement: MOESM1 [file 10274084]

**Table S1. The list of the 604 proteins identified in nasal exosomes and the lists of proteins identified with IPA and GO Term finder.**

| Accession # | Description                                                      | Gene name | # Peptides | Identified in both pools | Core exosome proteome | Membrane-bound vesicle proteins | Immune-related proteins |
|-------------|------------------------------------------------------------------|-----------|------------|--------------------------|-----------------------|---------------------------------|-------------------------|
| Q04446      | 1,4-alpha-glucan-branching enzyme                                | GBE1      | 1          |                          |                       |                                 |                         |
| P31946      | 14-3-3 protein beta/alpha                                        | YWHAB     | 3          |                          | X                     | X                               |                         |
| P62258      | 14-3-3 protein epsilon                                           | YWHAE     | 1          |                          | X                     | X                               |                         |
| P31947      | 14-3-3 protein sigma                                             | SFN       | 3          | X                        | X                     |                                 | X                       |
| P27348      | 14-3-3 protein theta                                             | YWHA      | 3          |                          |                       |                                 |                         |
| P63104      | 14-3-3 protein zeta/delta                                        | YWHAZ     | 4          | X                        | X                     | X                               |                         |
| Q01970      | 1-phosphatidylinositol-4,5-bisphosphate phosphodiesterase beta-3 | PLCB3     | 1          | X                        |                       |                                 | X                       |
| P09543      | 2',3'-cyclic-nucleotide 3'-phosphodiesterase                     | CNP       | 3          | X                        | X                     | X                               | X                       |
| P62191      | 26S protease regulatory subunit 4                                | PSMC1     | 1          |                          |                       |                                 |                         |
| P62266      | 40S ribosomal protein S23                                        | RPS23     | 1          | X                        |                       |                                 |                         |
| P61247      | 40S ribosomal protein S3a                                        | RPS3A     | 1          |                          |                       |                                 |                         |
| Q9BRK5      | 45 kDa calcium-binding protein                                   | SDF4      | 1          | X                        |                       |                                 |                         |
| P21589      | 5'-nucleotidase                                                  | NT5E      | 1          |                          |                       |                                 | X                       |
| P62750      | 60S ribosomal protein L23a                                       | RPL23A    | 1          |                          |                       |                                 |                         |
| P39023      | 60S ribosomal protein L3                                         | RPL3      | 1          |                          |                       |                                 |                         |
| P46777      | 60S ribosomal protein L5                                         | RPL5      | 1          |                          |                       |                                 |                         |
| P18124      | 60S ribosomal protein L7                                         | RPL7      | 1          |                          |                       |                                 |                         |
| P52209      | 6-phosphogluconate dehydrogenase, decarboxylating                | PGD       | 1          | X                        |                       |                                 |                         |
| O75173      | A disintegrin and metalloproteinase with thrombospondin motifs 4 | ADAMTS4   | 1          |                          |                       |                                 |                         |
| Q8IZP0      | Abl interactor 1                                                 | ABI1      | 1          |                          |                       |                                 | X                       |
| Q13510      | Acid ceramidase                                                  | ASAHI     | 1          |                          |                       |                                 |                         |
| Q92485      | Acid sphingomyelinase-like phosphodiesterase 3b                  | SMPDL3B   | 1          |                          |                       |                                 |                         |
| P68032      | Actin, alpha cardiac muscle 1                                    | ACTC1     | 11         |                          |                       |                                 |                         |
| P60709      | Actin, cytoplasmic 1                                             | ACTB      | 17         | X                        | X                     |                                 | X                       |
| O15143      | Actin-related protein 2/3 complex subunit 1B                     | ARPC1B    | 1          |                          |                       |                                 |                         |
| O15144      | Actin-related protein 2/3 complex subunit 2                      | ARPC2     | 2          | X                        |                       |                                 |                         |

| Accession # | Description                                                            | Gene name | # Peptides | Identified in both pools | Core exosome proteome | Membrane-bound vesicle proteins | Immune-related proteins |
|-------------|------------------------------------------------------------------------|-----------|------------|--------------------------|-----------------------|---------------------------------|-------------------------|
| P59998      | Actin-related protein 2/3 complex subunit 4                            | ARPC4     | 1          |                          |                       |                                 |                         |
| P07108      | Acyl-CoA-binding protein                                               | DBI       | 2          | X                        |                       |                                 |                         |
| P23526      | Adenosylhomocysteinase                                                 | AHCY      | 1          |                          | X                     | X                               |                         |
| Q01518      | Adenylyl cyclase-associated protein 1                                  | CAP1      | 4          | X                        |                       |                                 |                         |
| P61204      | ADP-ribosylation factor 3                                              | ARF3      | 1          |                          | X                     |                                 |                         |
| P43353      | Aldehyde dehydrogenase family 3 member B1                              | ALDH3B1   | 5          | X                        |                       |                                 |                         |
| P30838      | Aldehyde dehydrogenase, dimeric NADP-preferring                        | ALDH3A    | 4          | X                        |                       |                                 |                         |
| Q04828      | Aldo-keto reductase family 1 member C1                                 | AKR1C1    | 3          |                          |                       |                                 |                         |
| P05186      | Alkaline phosphatase, tissue-nonspecific isozyme                       | ALPL      | 7          | X                        |                       |                                 | X                       |
| P51993      | Alpha-(1,3)-fucosyltransferase                                         | FUT6      | 3          | X                        |                       |                                 |                         |
| P26572      | Alpha-1,3-mannosyl-glycoprotein 2-beta-N-acetylglucosaminyltransferase | MGAT1     | 1          |                          |                       |                                 |                         |
| P02763      | Alpha-1-acid glycoprotein 1                                            | ORM1      | 1          |                          |                       |                                 | X                       |
| P01011      | Alpha-1-antichymotrypsin                                               | SERPINA3  | 2          | X                        |                       |                                 | X                       |
| P01009      | Alpha-1-antitrypsin                                                    | SERPINA1  | 6          | X                        |                       | X                               | X                       |
| P04217      | Alpha-1B-glycoprotein                                                  | A1BG      | 1          |                          |                       |                                 |                         |
| P02765      | Alpha-2-HS-glycoprotein                                                | AHSG      | 1          | X                        |                       |                                 | X                       |
| P01023      | Alpha-2-macroglobulin                                                  | A2M       | 26         | X                        |                       | X                               | X                       |
| A8K2U0      | Alpha-2-macroglobulin-like protein 1                                   | A2ML1     | 1          |                          |                       |                                 |                         |
| P12814      | Alpha-actinin-1                                                        | ACTN1     | 6          | X                        |                       | X                               |                         |
| O43707      | Alpha-actinin-4                                                        | ACTN4     | 8          | X                        | X                     | X                               | X                       |
| P06733      | Alpha-enolase                                                          | ENO1      | 6          | X                        | X                     |                                 | X                       |
| P54920      | Alpha-soluble NSF attachment protein                                   | NAPA      | 1          |                          |                       |                                 |                         |
| Q12904      | Aminoacyl tRNA synthase complex-interacting multifunctional protein 1  | AIMP      | 1          |                          |                       | X                               | X                       |
| Q9H4A4      | Aminopeptidase B                                                       | RNPEP     | 1          |                          |                       | X                               |                         |
| P15144      | Aminopeptidase N                                                       | ANPEP     | 8          | X                        | X                     | X                               | X                       |
| P04083      | Annexin A1                                                             | ANXA1     | 5          | X                        | X                     |                                 | X                       |
| P50995      | Annexin A11                                                            | ANXA11    | 1          | X                        | X                     | X                               |                         |

| Accession # | Description                                                                            | Gene name | # Peptides | Identified in both pools | Core exosome proteome | Membrane-bound vesicle proteins | Immune-related proteins |
|-------------|----------------------------------------------------------------------------------------|-----------|------------|--------------------------|-----------------------|---------------------------------|-------------------------|
| Q5XXA6      | Anoctamin-1                                                                            | ANO1      | 6          | X                        |                       |                                 |                         |
| P03973      | Antileukoproteinase                                                                    | SLPI      | 7          | X                        |                       |                                 | X                       |
| P02647      | Apolipoprotein A-I                                                                     | APOA1     | 8          | X                        |                       | X                               | X                       |
| P02652      | Apolipoprotein A-II                                                                    | APOA2     | 2          | X                        |                       |                                 | X                       |
| P06727      | Apolipoprotein A-IV                                                                    | APOA4     | 4          | X                        |                       |                                 | X                       |
| P04114      | Apolipoprotein B-100                                                                   | APOB      | 5          |                          |                       | X                               | X                       |
| P02654      | Apolipoprotein C-I                                                                     | APOC1     | 2          | X                        |                       |                                 |                         |
| P02649      | Apolipoprotein E                                                                       | APOE      | 1          | X                        | X                     |                                 | X                       |
| P29972      | Aquaporin-1                                                                            | AQP1      | 1          |                          |                       |                                 | X                       |
| P55064      | Aquaporin-5                                                                            | AQP5      | 1          | X                        |                       |                                 |                         |
| P16050      | Arachidonate 15-lipoxygenase                                                           | ALOX15    | 3          | X                        |                       |                                 | X                       |
| P05089      | Arginase-1                                                                             | ARG1      | 1          |                          |                       |                                 | X                       |
| P00505      | Aspartate aminotransferase, mitochondrial                                              | GOT2      | 1          | X                        |                       |                                 |                         |
| P53396      | ATP-citrate synthase                                                                   | ACLY      | 1          |                          | X                     |                                 |                         |
| Q96BJ3      | Axin interactor, dorsalization-associated protein                                      | AIDA      | 1          | X                        |                       |                                 |                         |
| P17213      | Bactericidal permeability-increasing protein                                           | BPI       | 1          |                          |                       |                                 | X                       |
| Q8N4F0      | Bactericidal/permeability-increasing protein-like 1                                    | BPIL1     | 4          | X                        |                       |                                 |                         |
| P98160      | Basement membrane-specific heparan sulfate proteoglycan core protein                   | HSPG2     | 30         | X                        | X                     |                                 | X                       |
| O95395      | Beta-1,3-galactosyl-O-glycosyl-glycoprotein beta-1,6-N-acetylglucosaminyltransferase 3 | GCNT      | 2          | X                        |                       |                                 | X                       |
| Q8NES3      | Beta-1,3-N-acetylglucosaminyltransferase lunatic fringe                                | LFNG      | 1          |                          |                       |                                 | X                       |
| O60513      | Beta-1,4-galactosyltransferase 4                                                       | B4GALT4   | 1          |                          |                       |                                 |                         |
| P61769      | Beta-2-microglobulin                                                                   | B2M       | 5          | X                        |                       | X                               | X                       |
| Q562R1      | Beta-actin-like protein 2                                                              | ACTBL2    | 5          | X                        |                       |                                 |                         |
| Q9Y5Z0      | Beta-secretase 2                                                                       | BACE2     | 1          | X                        |                       |                                 |                         |
| Q13867      | Bleomycin hydrolase                                                                    | BLMH      | 3          | X                        |                       |                                 |                         |
| Q10589      | Bone marrow stromal antigen 2                                                          | BST2      | 1          | X                        |                       |                                 | X                       |
| Q9NP55      | BPI fold-containing family A member 1                                                  | BPIFA1    | 1          |                          |                       |                                 | X                       |
| Q8TDL5      | BPI fold-containing family B member 1                                                  | BPIFB1    | 12         | X                        |                       |                                 |                         |

| Accession # | Description                                                                 | Gene name | # Peptides | Identified in both pools | Core exosome proteome | Membrane-bound vesicle proteins | Immune-related proteins |
|-------------|-----------------------------------------------------------------------------|-----------|------------|--------------------------|-----------------------|---------------------------------|-------------------------|
| P59826      | BPI fold-containing family B member 3                                       | BPIFB3    | 1          | X                        |                       |                                 |                         |
| P59827      | BPI fold-containing family B member 4                                       | BPIFB4    | 1          | X                        |                       |                                 |                         |
| P80723      | Brain acid soluble protein 1                                                | BASP1     | 2          |                          |                       |                                 |                         |
| Q9UQB8      | Brain-specific angiogenesis inhibitor 1-associated protein 2                | BAIAP2    | 2          |                          |                       |                                 |                         |
| P11274      | Breakpoint cluster region protein                                           | BCR       | 1          |                          |                       |                                 | X                       |
| O75363      | Breast carcinoma-amplified sequence 1                                       | BCAS1     | 1          |                          |                       |                                 |                         |
| P04003      | C4b-binding protein alpha chain                                             | C4BPA     | 4          | X                        |                       |                                 | X                       |
| P20851      | C4b-binding protein beta chain                                              | C4BPB     | 1          |                          |                       |                                 | X                       |
| Q9H251      | Cadherin-23                                                                 | CDH23     | 1          |                          |                       |                                 |                         |
| Q6ZTQ4      | Cadherin-related family member 3                                            | CDHR3     | 2          |                          |                       |                                 |                         |
| A6H8M9      | Cadherin-related family member 4                                            | CDHR4     | 1          |                          |                       |                                 |                         |
| Q99828      | Calcium and integrin-binding protein 1                                      | CIB1      | 1          |                          |                       |                                 | X                       |
| Q14CN2      | Calcium-activated chloride channel regulator 4                              | CLCA4     | 1          |                          |                       |                                 |                         |
| Q9Y376      | Calcium-binding protein 39                                                  | CAB39     | 3          | X                        |                       |                                 |                         |
| P62158      | Calmodulin                                                                  | CALM1     | 1          |                          |                       |                                 |                         |
| P04632      | Calpain small subunit 1                                                     | CAPNS1    | 1          |                          |                       |                                 | X                       |
| O15484      | Calpain-5                                                                   | CAPN5     | 5          | X                        |                       |                                 |                         |
| P27797      | Calreticulin                                                                | CALR      | 2          |                          |                       | X                               | X                       |
| P17612      | cAMP-dependent protein kinase catalytic subunit alpha                       | PRKAC     | 1          |                          |                       |                                 | X                       |
| Q9GZX3      | Carbohydrate sulfotransferase 6                                             | CHST6     | 1          |                          |                       |                                 |                         |
| P00918      | Carbonic anhydrase 2                                                        | CA2       | 1          |                          |                       |                                 | X                       |
| Q9GZU7      | Carboxy-terminal domain RNA polymerase II polypeptide A small phosphatase 1 | CTDSP1    | 1          |                          |                       |                                 |                         |
| Q9UKL3      | CASP8-associated protein 2                                                  | CASP8AP2  | 1          |                          |                       |                                 |                         |
| P31944      | Caspase-14                                                                  | CASP14    | 2          |                          |                       |                                 |                         |
| P04040      | Catalase                                                                    | CAT       | 2          | X                        |                       |                                 | X                       |
| P07858      | Cathepsin B                                                                 | CTSB      | 1          | X                        |                       | X                               | X                       |
| P07339      | Cathepsin D                                                                 | CTSD      | 1          |                          |                       | X                               | X                       |
| P08311      | Cathepsin G                                                                 | CTSG      | 7          | X                        |                       | X                               | X                       |

| Accession # | Description                                     | Gene name | # Peptides | Identified in both pools | Core exosome proteome | Membrane-bound vesicle proteins | Immune-related proteins |
|-------------|-------------------------------------------------|-----------|------------|--------------------------|-----------------------|---------------------------------|-------------------------|
| P11717      | Cation-independent mannose-6-phosphate receptor | IGF2R     | 1          |                          |                       | X                               | X                       |
| Q9NNX6      | CD209 antigen                                   | CD209     | 1          |                          |                       |                                 | X                       |
| Q9Y5K6      | CD2-associated protein                          | CD2AP     | 2          | X                        |                       |                                 | X                       |
| P29965      | CD40 ligand                                     | CD40LG    | 1          |                          |                       |                                 | X                       |
| O43866      | CD5 antigen-like                                | CD5L      | 3          | X                        |                       |                                 | X                       |
| P13987      | CD59 glycoprotein                               | CD59      | 2          | X                        | X                     |                                 | X                       |
| P08962      | CD63 antigen                                    | CD63      | 1          |                          | X                     | X                               | X                       |
| P21926      | CD9 antigen                                     | CD9       | 1          | X                        | X                     | X                               | X                       |
| P60953      | Cell division control protein 42 homolog        | CDC42     | 1          |                          | X                     |                                 | X                       |
| P00450      | Ceruloplasmin                                   | CP        | 9          | X                        |                       |                                 |                         |
| Q7LBR1      | Charged multivesicular body protein 1b          | CHMP1B    | 1          |                          |                       |                                 |                         |
| O43633      | Charged multivesicular body protein 2a          | CHMP2A    | 1          |                          |                       |                                 |                         |
| Q9H444      | Charged multivesicular body protein 4b          | CHMP4B    | 1          |                          |                       |                                 |                         |
| O00299      | Chloride intracellular channel protein 1        | CLIC1     | 3          | X                        | X                     |                                 | X                       |
| O95833      | Chloride intracellular channel protein 3        | CLIC3     | 1          |                          |                       |                                 |                         |
| Q9Y696      | Chloride intracellular channel protein 4        | CLIC4     | 1          |                          |                       | X                               | X                       |
| Q96NY7      | Chloride intracellular channel protein 6        | CLIC6     | 5          | X                        |                       |                                 |                         |
| Q8IWA5      | Choline transporter-like protein 2              | SLC44A2   | 2          | X                        |                       |                                 |                         |
| Q53GD3      | Choline transporter-like protein 4              | SLC44A4   | 2          | X                        |                       |                                 |                         |
| Q00610      | Clathrin heavy chain 1                          | CLTC      | 2          |                          | X                     | X                               |                         |
| P09497      | Clathrin light chain B                          | CLTB      | 1          | X                        |                       | X                               |                         |
| P10909      | Clusterin                                       | CLU       | 12         | X                        | X                     | X                               | X                       |
| P12259      | Coagulation factor V                            | F5        | 3          | X                        |                       | X                               | X                       |
| P53618      | Coatomer subunit beta                           | COPB1     | 1          |                          |                       | X                               |                         |
| P23528      | Cofilin-1                                       | CFL1      | 3          | X                        | X                     |                                 |                         |
| Q8NCX0      | Coiled-coil domain-containing protein 150       | CCDC150   | 1          |                          |                       |                                 |                         |
| P25940      | Collagen alpha-3(V) chain                       | COL5A3    | 1          |                          |                       |                                 |                         |
| P02746      | Complement C1q subcomponent subunit B           | C1QB      | 1          |                          |                       |                                 |                         |
| P06681      | Complement C2                                   | C2        | 2          |                          |                       |                                 | X                       |
| P01024      | Complement C3                                   | C3        | 29         | X                        |                       |                                 | X                       |

| Accession # | Description                                                    | Gene name | # Peptides | Identified in both pools | Core exosome proteome | Membrane-bound vesicle proteins | Immune-related proteins |
|-------------|----------------------------------------------------------------|-----------|------------|--------------------------|-----------------------|---------------------------------|-------------------------|
| P0C0L4      | Complement C4-A                                                | C4A       | 5          | X                        |                       |                                 | X                       |
| P01031      | Complement C5                                                  | C5        | 1          |                          |                       |                                 | X                       |
| P13671      | Complement component C6                                        | C6        | 2          | X                        |                       |                                 | X                       |
| P07358      | Complement component C8 beta chain                             | C8B       | 1          | X                        |                       |                                 | X                       |
| P00751      | Complement factor B                                            | CFB       | 3          | X                        |                       |                                 | X                       |
| P08603      | Complement factor H                                            | CFH       | 3          | X                        |                       |                                 | X                       |
| Q9BPX3      | Condensin complex subunit 3                                    | NCAPG     | 1          |                          |                       |                                 |                         |
| P22528      | Cornifin-B                                                     | SPRR1B    | 1          |                          |                       |                                 |                         |
| Q9UBG3      | Cornulin                                                       | CRNN      | 1          | X                        |                       |                                 |                         |
| P31146      | Coronin-1A                                                     | CORO1A    | 1          |                          |                       | X                               | X                       |
| Q9BUF7      | Crumbs protein homolog 3                                       | CRB3      | 1          | X                        |                       |                                 |                         |
| Q13616      | Cullin-1                                                       | CUL1      | 1          |                          |                       |                                 |                         |
| P04080      | Cystatin-B                                                     | CSTB      | 3          | X                        |                       |                                 |                         |
| P01034      | Cystatin-C                                                     | CST3      | 1          |                          |                       |                                 | X                       |
| P01036      | Cystatin-S                                                     | CST4      | 1          |                          |                       |                                 |                         |
| P50238      | Cysteine-rich protein 1                                        | CRIP1     | 1          |                          |                       |                                 |                         |
| P16562      | Cysteine-rich secretory protein 2                              | CRISP2    | 1          |                          |                       |                                 |                         |
| Q9UGM3      | Deleted in malignant brain tumors 1 protein                    | DMBT1     | 24         | X                        |                       | X                               | X                       |
| P81605      | Dermcidin                                                      | DCD       | 1          |                          |                       |                                 |                         |
| Q6E0U4      | Dermokine                                                      | DMKN      | 1          |                          |                       |                                 |                         |
| Q08554      | Desmocollin-1                                                  | DSC1      | 4          | X                        |                       |                                 | X                       |
| Q02413      | Desmoglein-1                                                   | DSG1      | 4          | X                        |                       |                                 |                         |
| P32926      | Desmoglein-3                                                   | DSG3      | 1          | X                        |                       |                                 | X                       |
| P15924      | Desmoplakin                                                    | DSP       | 2          |                          |                       |                                 |                         |
| P60981      | Destrin                                                        | DSTN      | 1          |                          |                       |                                 |                         |
| P27487      | Dipeptidyl peptidase 4                                         | DPP4      | 7          | X                        | X                     | X                               | X                       |
| O14672      | Disintegrin and metalloproteinase domain-containing protein 10 | ADAM10    | 1          |                          |                       | X                               | X                       |
| P49643      | DNA primase large subunit                                      | PRIM2     | 1          |                          |                       |                                 |                         |
| Q13217      | DnaJ homolog subfamily C member 3                              | DNAJC3    | 6          | X                        |                       |                                 |                         |

| Accession # | Description                                                        | Gene name | # Peptides | Identified in both pools | Core exosome proteome | Membrane-bound vesicle proteins | Immune-related proteins |
|-------------|--------------------------------------------------------------------|-----------|------------|--------------------------|-----------------------|---------------------------------|-------------------------|
| Q9UJU6      | Drebrin-like protein                                               | DBNL      | 1          | X                        |                       |                                 |                         |
| Q9NRD8      | Dual oxidase 2                                                     | DUOX2     | 3          | X                        |                       |                                 |                         |
| P11532      | Dystrophin                                                         | DMD       | 1          |                          |                       |                                 | X                       |
| O60291      | E3 ubiquitin-protein ligase MGRN1                                  | MGRN1     | 1          | X                        |                       |                                 |                         |
| O75355      | Ectonucleoside triphosphate diphosphohydrolase 3                   | ENTPD3    | 1          | X                        |                       |                                 |                         |
| O14638      | Ectonucleotide pyrophosphatase/phosphodiesterase family member 3   | ENPP3     | 2          | X                        |                       |                                 | X                       |
| Q9H4M9      | EH domain-containing protein 1                                     | EHD1      | 3          | X                        | X                     | X                               |                         |
| Q9H223      | EH domain-containing protein 4                                     | EHD4      | 1          |                          | X                     |                                 |                         |
| P68104      | Elongation factor 1-alpha 1                                        | EEF1A1    | 1          |                          | X                     |                                 |                         |
| P13639      | Elongation factor 2                                                | EEF2      | 3          | X                        | X                     |                                 |                         |
| P14625      | Endoplasmic reticulum chaperone protein                            | HSP90B1   | 2          | X                        |                       | X                               | X                       |
| P11678      | Eosinophil peroxidase                                              | EPX       | 2          |                          |                       |                                 | X                       |
| Q12929      | Epidermal growth factor receptor kinase substrate 8                | EPS8      | 1          | X                        |                       |                                 |                         |
| Q8TE68      | Epidermal growth factor receptor kinase substrate 8-like protein 1 | EPS8L1    | 3          | X                        |                       |                                 |                         |
| Q9H6S3      | Epidermal growth factor receptor kinase substrate 8-like protein 2 | EPS8L2    | 1          | X                        |                       |                                 |                         |
| Q9GZV4      | Eukaryotic translation initiation factor 5A-2                      | EIF5A2    | 1          | X                        |                       |                                 |                         |
| P56537      | Eukaryotic translation initiation factor 6                         | EIF6      | 1          |                          |                       |                                 |                         |
| Q96KP1      | Exocyst complex component 2                                        | EXOC2     | 1          |                          |                       |                                 |                         |
| Q9GZZ8      | Extracellular glycoprotein lacritin                                | LACRT     | 6          | X                        |                       | X                               |                         |
| P15311      | Ezrin                                                              | EZR       | 27         | X                        | X                     |                                 |                         |
| P47755      | F-actin-capping protein subunit alpha-2                            | CAPZA2    | 1          |                          |                       |                                 |                         |
| P47756      | F-actin-capping protein subunit beta                               | CAPZB     | 2          |                          |                       |                                 |                         |
| Q01469      | Fatty acid-binding protein, epidermal                              | FABP5     | 2          |                          |                       |                                 | X                       |
| P02671      | Fibrinogen alpha chain                                             | FGA       | 6          | X                        |                       | X                               | X                       |
| P02675      | Fibrinogen beta chain                                              | FGB       | 7          | X                        |                       | X                               | X                       |
| P02679      | Fibrinogen gamma chain                                             | FGG       | 9          | X                        |                       | X                               | X                       |
| Q14314      | Fibroleukin                                                        | FGL2      | 1          |                          |                       |                                 | X                       |
| P02751      | Fibronectin                                                        | FN1       | 8          | X                        | X                     | X                               | X                       |

| Accession # | Description                                          | Gene name | # Peptides | Identified in both pools | Core exosome proteome | Membrane-bound vesicle proteins | Immune-related proteins |
|-------------|------------------------------------------------------|-----------|------------|--------------------------|-----------------------|---------------------------------|-------------------------|
| O00602      | Ficolin-1                                            | FCN1      | 1          |                          |                       |                                 |                         |
| P20930      | Filaggrin                                            | FLG       | 15         | X                        |                       | X                               |                         |
| Q5D862      | Filaggrin-2                                          | FLG2      | 8          | X                        |                       |                                 |                         |
| P21333      | Filamin-A                                            | FLNA      | 6          | X                        |                       |                                 | X                       |
| O75369      | Filamin-B                                            | FLNB      | 1          | X                        |                       |                                 |                         |
| P30043      | Flavin reductase                                     | BLVRB     | 1          |                          |                       |                                 |                         |
| P15328      | Folate receptor alpha                                | FOLR1     | 1          |                          |                       |                                 |                         |
| Q5H8C1      | FRAS1-related extracellular matrix protein 1         | FREM1     | 1          |                          |                       |                                 |                         |
| P0C091      | FRAS1-related extracellular matrix protein 3         | FREM      | 5          | X                        |                       |                                 |                         |
| P09467      | Fructose-1,6-bisphosphatase 1                        | FBP1      | 1          |                          |                       |                                 |                         |
| P04075      | Fructose-bisphosphate aldolase A                     | ALDOA     | 7          | X                        | X                     | X                               | X                       |
| P17931      | Galectin-3                                           | LGALS3    | 5          | X                        | X                     |                                 | X                       |
| Q08380      | Galectin-3-binding protein                           | LGALS3BP  | 12         | X                        | X                     |                                 |                         |
| P47929      | Galectin-7                                           | LGALS7    | 1          |                          |                       |                                 |                         |
| P06396      | Gelsolin                                             | GSN       | 7          | X                        | X                     |                                 | X                       |
| P11413      | Glucose-6-phosphate 1-dehydrogenase                  | G6PD      | 1          | X                        |                       |                                 |                         |
| P06744      | Glucose-6-phosphate isomerase                        | GPI       | 1          |                          |                       |                                 | X                       |
| Q04609      | Glutamate carboxypeptidase 2                         | FOLH1     | 4          |                          |                       |                                 |                         |
| P15104      | Glutamine synthetase                                 | GLUL      | 2          | X                        |                       |                                 |                         |
| P08263      | Glutathione S-transferase A1                         | GSTA1     | 5          | X                        |                       |                                 |                         |
| P09211      | Glutathione S-transferase P                          | GSTP1     | 2          |                          | X                     |                                 | X                       |
| P04406      | Glyceraldehyde-3-phosphate dehydrogenase             | GAPDH     | 5          | X                        | X                     |                                 |                         |
| P11217      | Glycogen phosphorylase, muscle form                  | PYGM      | 7          | X                        |                       |                                 |                         |
| Q9NZH0      | G-protein coupled receptor family C group 5 member B | GPRC5B    | 1          |                          |                       | X                               |                         |
| Q9NQ84      | G-protein coupled receptor family C group 5 member C | GPRC5C    | 1          | X                        |                       | X                               |                         |
| P01112      | GTPase Hras                                          | HRAS      | 1          |                          |                       |                                 | X                       |
| P01116      | GTPase Kras                                          | KRAS      | 1          | X                        |                       |                                 | X                       |
| P62826      | GTP-binding nuclear protein Ran                      | RAN       | 1          | X                        | X                     | X                               |                         |



| Accession # | Description                                                          | Gene name | # Peptides | Identified in both pools | Core exosome proteome | Membrane-bound vesicle proteins | Immune-related proteins |
|-------------|----------------------------------------------------------------------|-----------|------------|--------------------------|-----------------------|---------------------------------|-------------------------|
| P63096      | Guanine nucleotide-binding protein G(i) subunit alpha-1              | GNAI1     | 1          |                          |                       |                                 |                         |
| P04899      | Guanine nucleotide-binding protein G(i) subunit alpha-2              | GNAI2     | 1          |                          | X                     |                                 | X                       |
| Q9UBI6      | Guanine nucleotide-binding protein G(I)/G(S)/G(O) subunit gamma-12   | GNG12     | 1          |                          |                       |                                 |                         |
| P63218      | Guanine nucleotide-binding protein G(I)/G(S)/G(O) subunit gamma-5    | GNG5      | 1          |                          |                       |                                 |                         |
| O60262      | Guanine nucleotide-binding protein G(I)/G(S)/G(O) subunit gamma-7    | GNG7      | 1          |                          |                       |                                 |                         |
| P62879      | Guanine nucleotide-binding protein G(I)/G(S)/G(T) subunit beta-2     | GNB2      | 4          |                          | X                     |                                 |                         |
| P08754      | Guanine nucleotide-binding protein G(k) subunit alpha                | GNAI3     | 1          | X                        | X                     | X                               | X                       |
| P50148      | Guanine nucleotide-binding protein G(q) subunit alpha                | GNAQ      | 4          | X                        | X                     |                                 | X                       |
| P63092      | Guanine nucleotide-binding protein G(s) subunit alpha isoforms short | GNAS      | 1          |                          | X                     |                                 | X                       |
| P29992      | Guanine nucleotide-binding protein subunit alpha-11                  | GNA11     | 2          |                          | X                     |                                 | X                       |
| P00738      | Haptoglobin                                                          | HP        | 16         | X                        |                       |                                 | X                       |
| P00739      | Haptoglobin-related protein                                          | HPR       | 8          |                          |                       |                                 |                         |
| P08107      | Heat shock 70 kDa protein 1A/1B                                      | HSPA1A    | 6          | X                        | X                     |                                 |                         |
| P34932      | Heat shock 70 kDa protein 4                                          | HSPA4     | 1          |                          |                       |                                 | X                       |
| P11142      | Heat shock cognate 71 kDa protein                                    | HSPA8     | 8          | X                        | X                     | X                               | X                       |
| P04792      | Heat shock protein beta-1                                            | HSPB1     | 1          | X                        |                       |                                 |                         |
| P07900      | Heat shock protein HSP 90-alpha                                      | HSP90AA1  | 3          | X                        | X                     | X                               | X                       |
| P69905      | Hemoglobin subunit alpha                                             | HBA1      | 4          | X                        |                       |                                 |                         |
| P68871      | Hemoglobin subunit beta                                              | HBB       | 6          |                          |                       |                                 | X                       |
| P02790      | Hemopexin                                                            | HPX       | 2          |                          |                       |                                 | X                       |
| P05546      | Heparin cofactor 2                                                   | SERPIND1  | 1          |                          |                       |                                 | X                       |
| P52790      | Hexokinase-3                                                         | HK3       | 1          |                          |                       |                                 |                         |
| Q13946      | High affinity cAMP-specific 3',5'-cyclic phosphodiesterase 7A        | PDE7A     | 1          |                          |                       |                                 | X                       |
| P26583      | High mobility group protein B2                                       | HMGB2     | 1          |                          |                       |                                 |                         |
| P42357      | Histidine ammonia-lyase                                              | HAL       | 3          | X                        |                       |                                 |                         |
| Q9NQE9      | Histidine triad nucleotide-binding protein 3                         | HINT3     | 1          |                          |                       |                                 |                         |
| P04196      | Histidine-rich glycoprotein                                          | HRG       | 2          |                          |                       | X                               | X                       |

| Accession # | Description                                              | Gene name | # Peptides | Identified in both pools | Core exosome proteome | Membrane-bound vesicle proteins | Immune-related proteins |
|-------------|----------------------------------------------------------|-----------|------------|--------------------------|-----------------------|---------------------------------|-------------------------|
| P07305      | Histone H1.0                                             | H1F0      | 2          |                          |                       |                                 |                         |
| P10412      | Histone H1.4                                             | HIST1H1E  | 4          |                          |                       |                                 |                         |
| P16401      | Histone H1.5                                             | HIST1H1B  | 2          |                          |                       |                                 |                         |
| Q96KK5      | Histone H2A type 1-H                                     | HIST1H2AH | 4          | X                        |                       |                                 |                         |
| P0C0S5      | Histone H2A.Z                                            | H2AFZ     | 2          |                          |                       |                                 |                         |
| O60814      | Histone H2B type 1-K                                     | HIST1H2BK | 5          | X                        |                       |                                 |                         |
| Q6NXT2      | Histone H3.3C                                            | H3F3C     | 2          |                          |                       |                                 |                         |
| P62805      | Histone H4                                               | HIST1H4A  | 8          | X                        | X                     |                                 |                         |
| P30443      | HLA class I histocompatibility antigen, A-1 alpha chain  | HLA-A     | 1          |                          | X                     | X                               | X                       |
| P79483      | HLA class II histocompatibility antigen, DR beta 3 chain | HLA-DRB3  | 2          |                          |                       |                                 | X                       |
| Q86YZ3      | Hornerin                                                 | HRNR      | 13         | X                        |                       |                                 |                         |
| Q9Y4L1      | Hypoxia up-regulated protein 1                           | HYOU1     | 1          |                          |                       |                                 | X                       |
| P01876      | Ig alpha-1 chain C region                                | IGHA1     | 22         | X                        |                       |                                 | X                       |
| P01877      | Ig alpha-2 chain C region                                | IGHA2     | 16         | X                        |                       |                                 |                         |
| P01880      | Ig delta chain C region                                  | IGHD      | 2          |                          |                       |                                 |                         |
| P01857      | Ig gamma-1 chain C region                                | IGHG1     | 5          | X                        |                       |                                 | X                       |
| P01860      | Ig gamma-3 chain C region                                | IGHG3     | 6          | X                        |                       |                                 | X                       |
| P01861      | Ig gamma-4 chain C region                                | IGHG4     | 2          |                          |                       |                                 |                         |
| P01743      | Ig heavy chain V-I region HG3                            |           | 1          | X                        |                       |                                 |                         |
| P01825      | Ig heavy chain V-II region NEWM                          |           | 1          | X                        |                       |                                 |                         |
| P04438      | Ig heavy chain V-II region SESS                          |           | 2          | X                        |                       |                                 |                         |
| P01766      | Ig heavy chain V-III region BRO                          |           | 3          |                          |                       |                                 |                         |
| P01782      | Ig heavy chain V-III region DOB                          |           | 1          |                          |                       |                                 |                         |
| P01781      | Ig heavy chain V-III region GAL                          |           | 2          |                          |                       |                                 |                         |
| P01765      | Ig heavy chain V-III region TIL                          |           | 4          |                          |                       |                                 |                         |
| P01834      | Ig kappa chain C region                                  | IGKC      | 10         | X                        |                       |                                 |                         |
| P01597      | Ig kappa chain V-I region DEE                            |           | 4          | X                        |                       |                                 |                         |

| Accession # | Description                                | Gene name | # Peptides | Identified in both pools | Core exosome proteome | Membrane-bound vesicle proteins | Immune-related proteins |
|-------------|--------------------------------------------|-----------|------------|--------------------------|-----------------------|---------------------------------|-------------------------|
| P01602      | Ig kappa chain V-I region HK102 (Fragment) | IGKV1-5   | 2          | X                        |                       |                                 |                         |
| P01605      | Ig kappa chain V-I region Lay              |           | 1          |                          |                       |                                 |                         |
| P04431      | Ig kappa chain V-I region Walker           |           | 1          | X                        |                       |                                 | X                       |
| P06310      | Ig kappa chain V-II region RPMI 6410       |           | 2          | X                        |                       |                                 |                         |
| P01617      | Ig kappa chain V-II region TEW             |           | 2          |                          |                       |                                 |                         |
| P01621      | Ig kappa chain V-III region NG9 (Fragment) |           | 2          |                          |                       |                                 |                         |
| P01623      | Ig kappa chain V-III region WOL            |           | 3          |                          |                       |                                 |                         |
| P06312      | Ig kappa chain V-IV region (Fragment)      | IGKV4     | 3          |                          |                       |                                 |                         |
| P04211      | Ig lambda chain V region 4A                |           | 1          | X                        |                       |                                 |                         |
| P01701      | Ig lambda chain V-I region NEW             |           | 2          |                          |                       |                                 |                         |
| P01702      | Ig lambda chain V-I region NIG-64          |           | 3          | X                        |                       |                                 |                         |
| P04208      | Ig lambda chain V-I region WAH             |           | 1          | X                        |                       |                                 |                         |
| P01710      | Ig lambda chain V-II region BO             |           | 1          |                          |                       |                                 |                         |
| P01706      | Ig lambda chain V-II region BOH            |           | 1          |                          |                       |                                 |                         |
| P01708      | Ig lambda chain V-II region BUR            |           | 2          | X                        |                       |                                 |                         |
| P01709      | Ig lambda chain V-II region MGC            |           | 2          | X                        |                       |                                 |                         |
| P01705      | Ig lambda chain V-II region NEI            |           | 2          | X                        |                       |                                 |                         |
| P80748      | Ig lambda chain V-III region LOI           |           | 2          |                          |                       |                                 |                         |
| P01714      | Ig lambda chain V-III region SH            |           | 1          | X                        |                       |                                 |                         |
| P01715      | Ig lambda chain V-IV region Bau            |           | 1          | X                        |                       |                                 |                         |
| POCG05      | Ig lambda-2 chain C regions                | IGLC2     | 9          | X                        |                       |                                 |                         |
| POCG06      | Ig lambda-3 chain C regions                | IGLC3     | 8          | X                        |                       |                                 |                         |
| A0M8Q6      | Ig lambda-7 chain C region                 | IGLC7     | 7          | X                        |                       |                                 |                         |
| P01871      | Ig mu chain C region                       | IGHM      | 16         | X                        |                       |                                 | X                       |
| Q9Y6R7      | IgGFc-binding protein                      | FCGBP     | 37         | X                        |                       |                                 |                         |
| P01591      | Immunoglobulin J chain                     | IGJ       | 9          | X                        |                       |                                 | X                       |
| B9A064      | Immunoglobulin lambda-like polypeptide 5   | IGLL5     | 10         | X                        |                       |                                 | X                       |
| Q8N436      | Inactive carboxypeptidase-like protein X2  | CPXM2     | 1          |                          |                       |                                 |                         |

| Accession # | Description                                                                 | Gene name | # Peptides | Identified in both pools | Core exosome proteome | Membrane-bound vesicle proteins | Immune-related proteins |
|-------------|-----------------------------------------------------------------------------|-----------|------------|--------------------------|-----------------------|---------------------------------|-------------------------|
| P12268      | Inosine-5'-monophosphate dehydrogenase 2                                    | IMPDH2    | 1          |                          |                       |                                 | X                       |
| P19827      | Inter-alpha-trypsin inhibitor heavy chain H1                                | ITIH1     | 1          |                          |                       |                                 |                         |
| P19823      | Inter-alpha-trypsin inhibitor heavy chain H2                                | ITIH2     | 3          | X                        |                       |                                 |                         |
| Q9UHD0      | Interleukin-19                                                              | IL19      | 1          |                          |                       |                                 | X                       |
| P07476      | Involucrin                                                                  | IVL       | 5          | X                        |                       |                                 |                         |
| O75874      | Isocitrate dehydrogenase [NADP] cytoplasmic                                 | IDH1      | 1          | X                        |                       |                                 |                         |
| O43240      | Kallikrein-10                                                               | KLK10     | 1          | X                        |                       |                                 |                         |
| P13645      | Keratin, type I cytoskeletal 10                                             | KRT10     | 10         | X                        | X                     |                                 | X                       |
| P02533      | Keratin, type I cytoskeletal 14                                             | KRT14     | 11         |                          |                       |                                 |                         |
| P08779      | Keratin, type I cytoskeletal 16                                             | KRT16     | 9          | X                        |                       |                                 |                         |
| Q04695      | Keratin, type I cytoskeletal 17                                             | KRT17     | 8          | X                        |                       |                                 | X                       |
| P35527      | Keratin, type I cytoskeletal 9                                              | KRT9      | 12         | X                        |                       |                                 |                         |
| P04264      | Keratin, type II cytoskeletal 1                                             | KRT1      | 11         | X                        |                       |                                 | X                       |
| P35908      | Keratin, type II cytoskeletal 2 epidermal                                   | KRT2      | 7          | X                        |                       |                                 |                         |
| P13647      | Keratin, type II cytoskeletal 5                                             | KRT5      | 6          | X                        | X                     |                                 |                         |
| P02538      | Keratin, type II cytoskeletal 6A                                            | KRT6      | 8          | X                        |                       |                                 |                         |
| O60938      | Keratocan                                                                   | KERA      | 1          | X                        |                       |                                 | X                       |
| Q5VWX1      | KH domain-containing, RNA-binding, signal transduction-associated protein 2 | KHDRBS2   | 1          |                          |                       |                                 |                         |
| O60282      | Kinesin heavy chain isoform 5C                                              | KIF5C     | 1          | X                        |                       |                                 |                         |
| P01042      | Kininogen-1                                                                 | KNG1      | 1          |                          |                       | X                               | X                       |
| P22079      | Lactoperoxidase                                                             | LPO       | 3          | X                        |                       |                                 |                         |
| P02788      | Lactotransferrin                                                            | LTF       | 61         | X                        |                       | X                               | X                       |
| Q04760      | Lactoylglutathione lyase                                                    | GLO1      | 1          |                          |                       |                                 |                         |
| P11047      | Laminin subunit gamma-1                                                     | LAMC1     | 1          |                          |                       |                                 |                         |
| Q9BXB1      | Leucine-rich repeat-containing G-protein coupled receptor 4                 | LGR4      | 1          |                          |                       |                                 |                         |
| P30740      | Leukocyte elastase inhibitor                                                | SERPINB1  | 3          | X                        |                       |                                 | X                       |
| Q14847      | LIM and SH3 domain protein 1                                                | LASP1     | 5          | X                        |                       |                                 |                         |
| P31025      | Lipocalin-1                                                                 | LCN1      | 2          |                          |                       |                                 |                         |
| Q6UWW0      | Lipocalin-15                                                                | LCN15     | 3          | X                        |                       |                                 |                         |

| Accession # | Description                                          | Gene name | # Peptides | Identified in both pools | Core exosome proteome | Membrane-bound vesicle proteins | Immune-related proteins |
|-------------|------------------------------------------------------|-----------|------------|--------------------------|-----------------------|---------------------------------|-------------------------|
| Q9NZR2      | Low-density lipoprotein receptor-related protein 1B  | LRP1B     | 1          | X                        |                       |                                 |                         |
| Q6UXB3      | Ly6/PLAUR domain-containing protein 2                | LYPD2     | 1          |                          |                       |                                 |                         |
| Q14210      | Lymphocyte antigen 6D                                | LY6D      | 2          |                          |                       |                                 |                         |
| P33241      | Lymphocyte-specific protein 1                        | LSP1      | 1          |                          |                       |                                 | X                       |
| Q14108      | Lysosome membrane protein 2                          | SCARB2    | 1          |                          |                       |                                 |                         |
| P11279      | Lysosome-associated membrane glycoprotein 1          | LAMP1     | 1          | X                        | X                     | X                               | X                       |
| P61626      | Lysozyme C                                           | LYZ       | 8          | X                        |                       |                                 | X                       |
| Q96JB8      | MAGUK p55 subfamily member 4                         | MPP4      | 1          |                          |                       |                                 |                         |
| Q14764      | Major vault protein                                  | MVP       | 1          |                          | X                     |                                 | X                       |
| P40926      | Malate dehydrogenase, mitochondrial                  | MDH2      | 1          |                          |                       |                                 |                         |
| O75556      | Mammaglobin-B                                        | SCGB2A1   | 3          | X                        |                       |                                 |                         |
| A6NHS7      | MANSC domain-containing protein ENSP00000370673      |           | 1          |                          |                       |                                 |                         |
| Q96A59      | MARVEL domain-containing protein 3                   | MARVELD3  | 1          |                          |                       |                                 |                         |
| O95460      | Matrilin-4                                           | MATN4     | 2          | X                        |                       |                                 |                         |
| P14780      | Matrix metalloproteinase-9                           | MMP9      | 1          | X                        |                       |                                 | X                       |
| P08582      | Melanotransferrin                                    | MF12      | 2          | X                        |                       |                                 |                         |
| Q13421      | Mesothelin                                           | MSLN      | 2          | X                        |                       |                                 | X                       |
| Q15691      | Microtubule-associated protein RP/EB family member 1 | MAPRE1    | 1          |                          |                       |                                 |                         |
| P21741      | Midkine                                              | MDK       | 2          |                          |                       |                                 | X                       |
| P45984      | Mitogen-activated protein kinase 9                   | MAPK9     | 1          |                          |                       |                                 | X                       |
| P26038      | Moesin                                               | MSN       | 18         | X                        | X                     | X                               | X                       |
| P08571      | Monocyte differentiation antigen CD14                | CD14      | 3          | X                        |                       |                                 | X                       |
| P15941      | Mucin-1                                              | MUC1      | 3          | X                        | X                     |                                 | X                       |
| Q9H3R2      | Mucin-13                                             | MUC13     | 1          |                          |                       |                                 |                         |
| Q8WX17      | Mucin-16                                             | MUC16     | 10         | X                        |                       |                                 |                         |
| Q02817      | Mucin-2                                              | MUC2      | 1          |                          |                       |                                 |                         |
| Q99102      | Mucin-4                                              | MUC4      | 3          |                          |                       |                                 |                         |
| P98088      | Mucin-5AC (Fragments)                                | MUC5AC    | 6          |                          |                       |                                 | X                       |

| Accession # | Description                                         | Gene name | # Peptides | Identified in both pools | Core exosome proteome | Membrane-bound vesicle proteins | Immune-related proteins |
|-------------|-----------------------------------------------------|-----------|------------|--------------------------|-----------------------|---------------------------------|-------------------------|
| Q9HC84      | Mucin-5B                                            | MUC5B     | 19         | X                        |                       |                                 |                         |
| Q8TAX7      | Mucin-7                                             | MUC7      | 2          |                          |                       |                                 |                         |
| P24158      | Myeloblastin                                        | PRTN3     | 1          |                          |                       |                                 | X                       |
| Q96S97      | Myeloid-associated differentiation marker           | MYADM     | 1          |                          |                       |                                 |                         |
| P05164      | Myeloperoxidase                                     | MPO       | 8          | X                        |                       | X                               | X                       |
| Q9NZM1      | Myoferlin                                           | MYOF      | 1          |                          |                       | X                               |                         |
| P60660      | Myosin light polypeptide 6                          | MYL6      | 2          |                          |                       |                                 |                         |
| P35579      | Myosin-9                                            | MYH9      | 37         | X                        | X                     |                                 | X                       |
| O43795      | Myosin-Ib                                           | MYO1B     | 1          |                          |                       |                                 |                         |
| O00159      | Myosin-Ic                                           | MYO1C     | 3          |                          |                       |                                 |                         |
| O94832      | Myosin-Id                                           | MYO1D     | 3          | X                        |                       |                                 |                         |
| Q9NQX4      | Myosin-Vc                                           | MYO5C     | 1          |                          |                       |                                 |                         |
| Q92614      | Myosin-XVIIIa                                       | MYO18A    | 1          |                          |                       |                                 |                         |
| P29966      | Myristoylated alanine-rich C-kinase substrate       | MARCKS    | 1          |                          |                       |                                 |                         |
| O14745      | Na(+)/H(+) exchange regulatory cofactor NHE-RF1     | SLC9A3R1  | 9          | X                        | X                     |                                 |                         |
| Q15599      | Na(+)/H(+) exchange regulatory cofactor NHE-RF2     | SLC9A3R2  | 5          | X                        |                       |                                 |                         |
| Q56NI9      | N-acetyltransferase ESCO2                           | ESCO2     | 1          | X                        |                       |                                 |                         |
| Q8N205      | Nesprin-4                                           | C19orf46  | 1          |                          |                       |                                 |                         |
| O95185      | Netrin receptor UNC5C                               | UNC5C     | 1          |                          |                       |                                 |                         |
| Q09666      | Neuroblast differentiation-associated protein AHNAK | AHNAK     | 1          |                          |                       |                                 | X                       |
| Q14697      | Neutral alpha-glucosidase AB                        | GANAB     | 7          | X                        |                       | X                               |                         |
| Q15758      | Neutral amino acid transporter B(0)                 | SLC1A5    | 1          |                          |                       | X                               |                         |
| P59665      | Neutrophil defensin 1                               | DEFA1     | 2          | X                        |                       | X                               |                         |
| P08246      | Neutrophil elastase                                 | ELANE     | 1          | X                        |                       | X                               | X                       |
| P80188      | Neutrophil gelatinase-associated lipocalin          | LCN2      | 1          |                          |                       |                                 | X                       |
| Q96TA1      | Niban-like protein 1                                | FAM129B   | 2          |                          |                       |                                 |                         |
| P35228      | Nitric oxide synthase, inducible                    | NOS2      | 10         | X                        |                       |                                 | X                       |
| Q8IVI9      | Nostrin                                             | NOSTRIN   | 1          |                          |                       | X                               |                         |
| Q9GZM8      | Nuclear distribution protein nudeE-like 1           | NDEL1     | 1          |                          |                       |                                 |                         |

| Accession # | Description                                                  | Gene name | # Peptides | Identified in both pools | Core exosome proteome | Membrane-bound vesicle proteins | Immune-related proteins |
|-------------|--------------------------------------------------------------|-----------|------------|--------------------------|-----------------------|---------------------------------|-------------------------|
| Q02818      | Nucleobindin-1                                               | NUCB1     | 4          | X                        |                       |                                 |                         |
| P80303      | Nucleobindin-2                                               | NUCB2     | 4          | X                        |                       |                                 |                         |
| Q9H173      | Nucleotide exchange factor SIL1                              | SIL1      | 1          |                          |                       |                                 |                         |
| P55259      | Pancreatic secretory granule membrane major glycoprotein GP2 | GP2 PE    | 2          |                          |                       |                                 |                         |
| O14908      | PDZ domain-containing protein GIPC1                          | GIPC1     | 1          | X                        |                       | X                               |                         |
| Q13113      | PDZK1-interacting protein 1                                  | PDZK1IP1  | 2          | X                        |                       |                                 |                         |
| P19021      | Peptidyl-glycine alpha-amidating monooxygenase               | PAM       | 1          |                          |                       | X                               |                         |
| P62937      | Peptidyl-prolyl cis-trans isomerase A                        | PPIA      | 2          | X                        | X                     |                                 | X                       |
| P23284      | Peptidyl-prolyl cis-trans isomerase B                        | PPIB      | 1          | X                        |                       | X                               | X                       |
| O43447      | Peptidyl-prolyl cis-trans isomerase H                        | PPIH      | 1          |                          |                       |                                 |                         |
| Q06830      | Peroxiredoxin-1                                              | PRDX1     | 3          | X                        | X                     | X                               | X                       |
| P32119      | Peroxiredoxin-2                                              | PRDX2     | 1          |                          | X                     |                                 | X                       |
| Q13162      | Peroxiredoxin-4                                              | PRDX4     | 2          | X                        |                       |                                 |                         |
| Q5SXH7      | PH domain-containing protein C10orf81                        | C10orf81  | 1          |                          |                       |                                 |                         |
| Q96S96      | Phosphatidylethanolamine-binding protein 4                   | PEBP4     | 1          |                          |                       |                                 |                         |
| Q8TBX8      | Phosphatidylinositol-5-phosphate 4-kinase type-2 gamma       | PIP4K2C   | 1          |                          |                       |                                 |                         |
| P00558      | Phosphoglycerate kinase 1                                    | PGK1      | 4          |                          | X                     |                                 |                         |
| P18669      | Phosphoglycerate mutase 1                                    | PGAM1     | 5          | X                        |                       |                                 |                         |
| P14555      | Phospholipase A2, membrane associated                        | PLA2G2A   | 2          | X                        |                       | X                               | X                       |
| O15162      | Phospholipid scramblase 1                                    | PLSCR1    | 1          |                          |                       |                                 | X                       |
| P55058      | Phospholipid transfer protein                                | PLTP      | 2          | X                        |                       |                                 | X                       |
| P05155      | Plasma protease C1 inhibitor                                 | SERPING1  | 1          |                          |                       | X                               | X                       |
| P00747      | Plasminogen                                                  | PLG       | 4          | X                        |                       | X                               | X                       |
| P07359      | Platelet glycoprotein Ib alpha chain                         | GP1BA     | 1          |                          |                       |                                 | X                       |
| P43034      | Platelet-activating factor acetylhydrolase IB subunit alpha  | PAFAH1B1  | 1          |                          |                       |                                 | X                       |
| Q494U1      | Pleckstrin homology domain-containing family N member 1      | PLEKHN1   | 1          |                          |                       |                                 |                         |
| O00592      | Podocalyxin                                                  | PODXL     | 1          |                          |                       |                                 | X                       |

| Accession # | Description                                                                    | Gene name | # Peptides | Identified in both pools | Core exosome proteome | Membrane-bound vesicle proteins | Immune-related proteins |
|-------------|--------------------------------------------------------------------------------|-----------|------------|--------------------------|-----------------------|---------------------------------|-------------------------|
| Q460N3      | Poly [ADP-ribose] polymerase 15                                                | PARP15    | 1          |                          |                       |                                 |                         |
| P01833      | Polymeric immunoglobulin receptor                                              | PIGR      | 31         | X                        | X                     | X                               | X                       |
| Q8IXK2      | Polypeptide N-acetylgalactosaminyltransferase 12                               | GALNT12   | 1          |                          |                       |                                 |                         |
| P0CG47      | Polyubiquitin-B                                                                | UBB       | 3          | X                        | X                     | X                               |                         |
| Q9P1Z3      | Potassium/sodium hyperpolarization-activated cyclic nucleotide-gated channel 3 | HCN3      | 1          |                          |                       |                                 |                         |
| Q6S8J3      | POTE ankyrin domain family member E                                            | POTE      | 7          |                          |                       |                                 |                         |
| P02545      | Prelamin-A/C                                                                   | LMNA      | 1          | X                        |                       |                                 |                         |
| Q13206      | Probable ATP-dependent RNA helicase DDX10                                      | DDX10     | 1          |                          |                       |                                 |                         |
| Q8WUW1      | Probable protein BRICK1                                                        | C3orf10   | 1          |                          |                       |                                 |                         |
| Q02809      | Procollagen-lysine,2-oxoglutarate 5-dioxygenase 1                              | PLOD1     | 2          | X                        |                       |                                 |                         |
| P07737      | Profilin-1                                                                     | PFN1      | 4          | X                        | X                     |                                 | X                       |
| Q8WUM4      | Programmed cell death 6-interacting protein                                    | PDCD6IP   | 13         | X                        | X                     | X                               |                         |
| P12273      | Prolactin-inducible protein                                                    | PIP       | 2          | X                        |                       |                                 |                         |
| Q99935      | Proline-rich protein 1                                                         | PROL1     | 3          | X                        |                       |                                 |                         |
| Q16378      | Proline-rich protein 4                                                         | PRR4      | 3          | X                        |                       |                                 |                         |
| O43490      | Prominin-1                                                                     | PROM1     | 9          | X                        |                       |                                 |                         |
| Q8N271      | Prominin-2                                                                     | PROM2     | 1          |                          |                       | X                               |                         |
| Q16651      | Prostasin                                                                      | PRSS8     | 1          |                          |                       |                                 |                         |
| Q9UL46      | Proteasome activator complex subunit 2                                         | PSME2     | 1          | X                        |                       |                                 | X                       |
| P25786      | Proteasome subunit alpha type-1                                                | PSMA1     | 1          |                          |                       |                                 |                         |
| P25787      | Proteasome subunit alpha type-2                                                | PSMA2     | 2          | X                        |                       |                                 |                         |
| P25788      | Proteasome subunit alpha type-3                                                | PSMA3     | 1          |                          |                       |                                 |                         |
| P60900      | Proteasome subunit alpha type-6                                                | PSMA6     | 1          |                          |                       |                                 |                         |
| P28070      | Proteasome subunit beta type-4                                                 | PSMB4     | 1          |                          |                       |                                 |                         |
| P28074      | Proteasome subunit beta type-5                                                 | PSMB5     | 2          |                          |                       |                                 | X                       |
| P28072      | Proteasome subunit beta type-6                                                 | PSMB6     | 1          | X                        |                       |                                 |                         |
| P28062      | Proteasome subunit beta type-8                                                 | PSMB8     | 1          | X                        |                       |                                 | X                       |
| Q8TCG1      | Protein CIP2A                                                                  | KIAA1524  | 1          |                          |                       |                                 |                         |
| O00622      | Protein CYR61                                                                  | CYR61     | 1          |                          |                       |                                 | X                       |



| Accession # | Description                                                       | Gene name | # Peptides | Identified in both pools | Core exosome proteome | Membrane-bound vesicle proteins | Immune-related proteins |
|-------------|-------------------------------------------------------------------|-----------|------------|--------------------------|-----------------------|---------------------------------|-------------------------|
| Q9P219      | Protein Daple                                                     | CCDC88C   | 1          |                          |                       |                                 |                         |
| P07237      | Protein disulfide-isomerase                                       | P4HB      | 5          | X                        | X                     | X                               | X                       |
| Q96MK3      | Protein FAM20A                                                    | FAM20A    | 1          |                          |                       |                                 |                         |
| Q9UNF0      | Protein kinase C and casein kinase substrate in neurons protein 2 | PACSIN2   | 1          |                          |                       | X                               |                         |
| Q9UN36      | Protein NDRG2                                                     | NDRG2     | 1          |                          |                       |                                 |                         |
| Q9UD71      | Protein phosphatase 1 regulatory subunit 1B                       | PPP1R1B   | 1          | X                        |                       |                                 |                         |
| Q16821      | Protein phosphatase 1 regulatory subunit 3A                       | PPP1R3A   | 1          |                          |                       |                                 |                         |
| Q5SGD2      | Protein phosphatase 1L                                            | PPM1L     | 1          |                          |                       |                                 |                         |
| P31949      | Protein S100-A11                                                  | S100A11   | 1          | X                        |                       |                                 |                         |
| P80511      | Protein S100-A12                                                  | S100A12   | 1          |                          |                       |                                 | X                       |
| Q9HCY8      | Protein S100-A14                                                  | S100A14   | 1          | X                        |                       |                                 | X                       |
| Q96FQ6      | Protein S100-A16                                                  | S100A16   | 3          | X                        |                       |                                 |                         |
| P29034      | Protein S100-A2                                                   | S100A2    | 1          |                          |                       |                                 |                         |
| P26447      | Protein S100-A4                                                   | S100A4    | 2          | X                        |                       |                                 | X                       |
| P05109      | Protein S100-A8                                                   | S100A8    | 10         | X                        |                       |                                 | X                       |
| P06702      | Protein S100-A9                                                   | S100A9    | 9          | X                        |                       |                                 | X                       |
| P22061      | Protein-L-isoaspartate(D-aspartate) O-methyltransferase           | PCMT1     | 1          |                          |                       |                                 |                         |
| P00734      | Prothrombin                                                       | F2        | 1          | X                        |                       |                                 | X                       |
| Q9NYQ8      | Protocadherin Fat 2                                               | FAT2      | 1          |                          |                       |                                 |                         |
| A6NMY6      | Putative annexin A2-like protein                                  | ANXA2P2   | 3          |                          |                       | X                               |                         |
| P0C874      | Putative FAM75-like protein FLJ44082                              |           | 1          |                          |                       |                                 |                         |
| B2RPK0      | Putative high mobility group protein B1-like 1                    | HMGB1L1   | 1          | X                        |                       |                                 |                         |
| Q2M2H8      | Putative maltase-glucoamylase-like protein LOC93432               |           | 2          |                          |                       |                                 |                         |
| B8ZZ34      | Putative protein shisa-8                                          | SHISA8    | 1          | X                        |                       |                                 |                         |
| A6NJ16      | Putative V-set and immunoglobulin domain-containing protein 6     | VSIG6     | 1          |                          |                       |                                 |                         |
| P14618      | Pyruvate kinase isozymes M1/M2                                    | PKM2      | 4          | X                        | X                     |                                 |                         |
| P50395      | Rab GDP dissociation inhibitor beta                               | GDI2      | 1          |                          | X                     |                                 |                         |

| Accession # | Description                                    | Gene name | # Peptides | Identified in both pools | Core exosome proteome | Membrane-bound vesicle proteins | Immune-related proteins |
|-------------|------------------------------------------------|-----------|------------|--------------------------|-----------------------|---------------------------------|-------------------------|
| P35241      | Radixin                                        | RDX       | 17         | X                        | X                     |                                 |                         |
| O95398      | Rap guanine nucleotide exchange factor 3       | RAPGEF3   | 1          |                          |                       |                                 | X                       |
| P46940      | Ras GTPase-activating-like protein IQGAP1      | IQGAP1    | 6          | X                        | X                     |                                 |                         |
| P63000      | Ras-related C3 botulinum toxin substrate 1     | RAC1      | 2          | X                        | X                     | X                               | X                       |
| P15153      | Ras-related C3 botulinum toxin substrate 2     | RAC2      | 2          |                          |                       |                                 | X                       |
| P61026      | Ras-related protein Rab-10                     | RAB10     | 1          |                          | X                     |                                 |                         |
| P62491      | Ras-related protein Rab-11A                    | RAB11A    | 1          | X                        | X                     | X                               |                         |
| P51153      | Ras-related protein Rab-13                     | RAB13     | 1          |                          | X                     | X                               |                         |
| Q9ULC3      | Ras-related protein Rab-23                     | RAB23     | 1          |                          |                       |                                 |                         |
| P57735      | Ras-related protein Rab-25                     | RAB25     | 1          |                          |                       | X                               |                         |
| P20339      | Ras-related protein Rab-5A                     | RAB5A     | 1          | X                        | X                     | X                               | X                       |
| P61006      | Ras-related protein Rab-8A                     | RAB8A     | 1          |                          |                       |                                 |                         |
| P11234      | Ras-related protein Ral-B                      | RALB      | 1          | X                        |                       |                                 | X                       |
| A6NIZ1      | Ras-related protein Rap-1b-like protein        |           | 3          |                          |                       |                                 |                         |
| Q12913      | Receptor-type tyrosine-protein phosphatase eta | PTPRJ     | 1          |                          |                       |                                 | X                       |
| O75787      | Renin receptor                                 | ATP6AP2   | 1          | X                        |                       |                                 |                         |
| Q6XPR3      | Repetin                                        | RPTN      | 2          |                          |                       |                                 |                         |
| P00352      | Retinal dehydrogenase 1                        | ALDH1A1   | 4          |                          |                       |                                 |                         |
| P49788      | Retinoic acid receptor responder protein 1     | RARRES1   | 1          | X                        |                       |                                 |                         |
| Q8NFJ5      | Retinoic acid-induced protein 3                | GPRC5A    | 2          | X                        |                       | X                               |                         |
| P52565      | Rho GDP-dissociation inhibitor 1               | ARHGDI A  | 2          | X                        |                       |                                 | X                       |
| P52566      | Rho GDP-dissociation inhibitor 2               | ARHGDI B  | 2          |                          |                       | X                               | X                       |
| Q07960      | Rho GTPase-activating protein 1                | ARHGAP1   | 1          | X                        |                       |                                 | X                       |
| Q96QB1      | Rho GTPase-activating protein 7                | DLC1      | 1          |                          |                       |                                 |                         |
| Q13464      | Rho-associated protein kinase 1                | ROCK1     | 2          |                          |                       |                                 | X                       |
| P34096      | Ribonuclease 4                                 | RNASE4    | 1          |                          |                       |                                 |                         |
| O00584      | Ribonuclease T2                                | RNASET2   | 1          |                          |                       |                                 |                         |
| Q5GAN4      | Ribonuclease-like protein 12                   | RNASE12   | 1          |                          |                       |                                 |                         |
| Q9P2E9      | Ribosome-binding protein 1                     | RRBP1     | 5          | X                        |                       |                                 |                         |
| Q86SE5      | RNA-binding Raly-like protein                  | RALYL     | 1          |                          |                       |                                 |                         |

| Accession # | Description                                                                   | Gene name | # Peptides | Identified in both pools | Core exosome proteome | Membrane-bound vesicle proteins | Immune-related proteins |
|-------------|-------------------------------------------------------------------------------|-----------|------------|--------------------------|-----------------------|---------------------------------|-------------------------|
| Q8N474      | Secreted frizzled-related protein 1                                           | SFRP1     | 5          | X                        |                       |                                 | X                       |
| O95968      | Secretoglobin family 1D member 1                                              | SCGB1D1   | 3          | X                        |                       |                                 |                         |
| Q02383      | Semenogelin-2                                                                 | SEMG2     | 10         | X                        |                       | X                               |                         |
| Q92743      | Serine protease HTRA1                                                         | HTRA1     | 5          | X                        |                       |                                 |                         |
| Q9Y6E0      | Serine/threonine-protein kinase 24                                            | STK24     | 1          |                          |                       |                                 |                         |
| Q9Y5S2      | Serine/threonine-protein kinase MRCK beta                                     | CDC42BPB  | 1          |                          |                       |                                 |                         |
| Q7L7X3      | Serine/threonine-protein kinase TAO1                                          | TAOK1     | 2          | X                        |                       |                                 |                         |
| Q9H2K8      | Serine/threonine-protein kinase TAO3                                          | TAOK3     | 2          |                          |                       |                                 |                         |
| P36873      | Serine/threonine-protein phosphatase PP1-gamma catalytic subunit              | PPP1CC    | 1          | X                        |                       |                                 |                         |
| P02787      | Serotransferrin                                                               | TF        | 24         | X                        |                       | X                               | X                       |
| P29508      | Serpin B3                                                                     | SERPINB3  | 8          | X                        |                       |                                 | X                       |
| P50452      | Serpin B8                                                                     | SERPINB8  | 1          |                          |                       |                                 |                         |
| P02768      | Serum albumin                                                                 | ALB       | 24         | X                        | X                     | X                               | X                       |
| P02735      | Serum amyloid A protein                                                       | SAA1      | 2          | X                        |                       |                                 | X                       |
| Q9H788      | SH2 domain-containing protein 4A                                              | SH2D4A    | 1          |                          |                       |                                 |                         |
| Q9UBC9      | Small proline-rich protein 3                                                  | SPRR3     | 1          |                          |                       |                                 |                         |
| Q9UN76      | Sodium- and chloride-dependent neutral and basic amino acid transporter B(0+) | SLC6A14   | 4          | X                        |                       |                                 |                         |
| P13866      | Sodium/glucose cotransporter 1                                                | SLC5A1    | 1          |                          |                       |                                 |                         |
| P48764      | Sodium/hydrogen exchanger 3                                                   | SLC9A3    | 1          |                          |                       |                                 |                         |
| Q8N695      | Sodium-coupled monocarboxylate transporter 1                                  | SLC5A8    | 2          | X                        |                       |                                 |                         |
| O95436      | Sodium-dependent phosphate transport protein 2B                               | SLC34A    | 1          |                          |                       |                                 |                         |
| Q16348      | Solute carrier family 15 member 2                                             | SLC15A2   | 4          | X                        |                       |                                 |                         |
| Q9HAS3      | Solute carrier family 28 member 3                                             | SLC28A3   | 2          | X                        |                       |                                 |                         |
| Q00796      | Sorbitol dehydrogenase                                                        | SORD      | 3          | X                        |                       |                                 |                         |
| P30626      | Sorcin                                                                        | SRI       | 1          |                          |                       |                                 |                         |
| Q96RF0      | Sorting nexin-18                                                              | SNX18     | 2          |                          |                       | X                               |                         |
| Q14515      | SPARC-like protein 1                                                          | SPARCL1   | 1          |                          |                       |                                 |                         |
| Q9BW04      | Specifically androgen-regulated gene protein                                  | SARG      | 1          | X                        |                       |                                 |                         |
| Q01082      | Spectrin beta chain, brain 1                                                  | SPTBN1    | 1          |                          |                       |                                 |                         |

| Accession # | Description                                           | Gene name | # Peptides | Identified in both pools | Core exosome proteome | Membrane-bound vesicle proteins | Immune-related proteins |
|-------------|-------------------------------------------------------|-----------|------------|--------------------------|-----------------------|---------------------------------|-------------------------|
| Q9H254      | Spectrin beta chain, brain 3                          | SPTBN4    | 1          | X                        |                       |                                 |                         |
| Q14247      | Src substrate cortactin                               | CTTN      | 3          | X                        |                       |                                 | X                       |
| Q9NQZ5      | StAR-related lipid transfer protein 7, mitochondrial  | STARD     | 1          |                          |                       |                                 |                         |
| Q9H2G2      | STE20-like serine/threonine-protein kinase            | SLK       | 2          | X                        |                       |                                 |                         |
| P09238      | Stromelysin-2                                         | MMP10     | 2          |                          |                       |                                 | X                       |
| O00391      | Sulfhydryl oxidase 1                                  | QSOX1     | 3          | X                        |                       |                                 |                         |
| P04179      | Superoxide dismutase [Mn], mitochondrial              | SOD2      | 1          |                          |                       |                                 | X                       |
| Q6UWP8      | Suprabasin                                            | SBSN      | 2          | X                        |                       |                                 |                         |
| Q99536      | Synaptic vesicle membrane protein VAT-1 homolog       | VAT1      | 1          |                          |                       |                                 |                         |
| O00161      | Synaptosomal-associated protein 23                    | SNAP23    | 1          |                          |                       | X                               |                         |
| Q13277      | Syntaxin-3                                            | STX3      | 2          | X                        |                       | X                               |                         |
| Q15833      | Syntaxin-binding protein 2                            | STXBP2    | 3          | X                        |                       | X                               |                         |
| O00560      | Syntenin-1                                            | SDCBP     | 2          |                          | X                     | X                               |                         |
| Q9H190      | Syntenin-2                                            | SDCBP2    | 1          | X                        |                       |                                 |                         |
| Q9Y490      | Talin-1                                               | TLN1      | 1          |                          |                       |                                 | X                       |
| Q6IQ55      | Tau-tubulin kinase 2                                  | TTBK2     | 1          |                          |                       |                                 |                         |
| P17987      | T-complex protein 1 subunit alpha                     | TCP1      | 1          |                          |                       |                                 |                         |
| P48643      | T-complex protein 1 subunit epsilon                   | CCT5      | 1          |                          |                       |                                 |                         |
| P40227      | T-complex protein 1 subunit zeta                      | CCT6A     | 1          |                          |                       |                                 |                         |
| P24821      | Tenascin                                              | TNC       | 2          |                          |                       |                                 | X                       |
| Q96AE7      | Tetratricopeptide repeat protein 17                   | TTC17     | 1          |                          |                       |                                 |                         |
| P10599      | Thioredoxin                                           | TXN       | 3          | X                        |                       |                                 | X                       |
| P07996      | Thrombospondin-1                                      | THBS1     | 3          | X                        | X                     | X                               | X                       |
| P19971      | Thymidine phosphorylase                               | TYMP      | 1          |                          |                       |                                 | X                       |
| O75674      | TOM1-like protein 1                                   | TOM1L1    | 1          |                          |                       |                                 |                         |
| P20061      | Transcobalamin-1                                      | TCN1      | 1          |                          |                       |                                 |                         |
| P35711      | Transcription factor SOX-5                            | SOX5      | 1          | X                        |                       |                                 |                         |
| Q15582      | Transforming growth factor-beta-induced protein ig-h3 | TGFBI     | 1          |                          |                       |                                 | X                       |
| P61586      | Transforming protein RhoA                             | RHOA      | 2          | X                        |                       |                                 | X                       |

| Accession # | Description                                                   | Gene name | # Peptides | Identified in both pools | Core exosome proteome | Membrane-bound vesicle proteins | Immune-related proteins |
|-------------|---------------------------------------------------------------|-----------|------------|--------------------------|-----------------------|---------------------------------|-------------------------|
| P29401      | Transketolase                                                 | TKT       | 5          | X                        |                       |                                 | X                       |
| O15321      | Transmembrane 9 superfamily member 1                          | TM9SF1    | 1          |                          |                       |                                 |                         |
| Q7Z404      | Transmembrane channel-like protein 4                          | TMC4      | 2          | X                        |                       |                                 |                         |
| Q6UXY8      | Transmembrane channel-like protein 5                          | TMC5      | 8          | X                        |                       |                                 |                         |
| Q9BUB7      | Transmembrane protein 70, mitochondrial                       | TMEM70    | 1          |                          |                       |                                 |                         |
| P02766      | Transthyretin                                                 | TTR       | 1          |                          |                       |                                 |                         |
| Q07654      | Trefoil factor 3                                              | TFF3      | 2          | X                        |                       | X                               | X                       |
| P60174      | Triosephosphate isomerase                                     | TPI1      | 1          | X                        | X                     |                                 | X                       |
| P68366      | Tubulin alpha-4A chain                                        | TUBA4A    | 2          |                          |                       |                                 |                         |
| P07437      | Tubulin beta chain                                            | TUBB      | 2          |                          |                       |                                 | X                       |
| P50591      | Tumor necrosis factor ligand superfamily member 10            | TNFSF10   | 2          |                          |                       |                                 | X                       |
| Q99816      | Tumor susceptibility gene 101 protein                         | TSG101    | 1          |                          | X                     |                                 |                         |
| P09758      | Tumor-associated calcium signal transducer 2                  | TACSTD2   | 1          |                          |                       |                                 |                         |
| O15327      | Type II inositol-3,4-bisphosphate 4-phosphatase               | INPP4B    | 1          |                          |                       |                                 |                         |
| P07948      | Tyrosine-protein kinase Lyn                                   | LYN       | 1          |                          |                       |                                 | X                       |
| Q8WUN7      | Ubiquitin domain-containing protein 2                         | UBTD2     | 1          |                          |                       |                                 |                         |
| P22314      | Ubiquitin-like modifier-activating enzyme 1                   | UBA1      | 2          | X                        |                       |                                 |                         |
| Q8NFL0      | UDP-GlcNAc:betaGal beta-1,3-N-acetylglucosaminyltransferase 7 | B3GNT7    | 1          |                          |                       |                                 |                         |
| Q96A22      | Uncharacterized protein C11orf52                              | C11orf52  | 1          |                          |                       |                                 |                         |
| Q9H246      | Uncharacterized protein C1orf21                               | C1orf21   | 1          | X                        |                       |                                 |                         |
| Q6NV74      | Uncharacterized protein C2orf55                               | C2orf55   | 1          |                          |                       |                                 |                         |
| Q86YA3      | Uncharacterized protein C4orf21                               | C4orf21   | 1          |                          |                       |                                 |                         |
| Q5T0Z8      | Uncharacterized protein C6orf132                              | C6orf132  | 3          |                          |                       |                                 |                         |
| Q8N8K9      | Uncharacterized protein KIAA1958                              | KIAA1958  | 1          |                          |                       |                                 |                         |
| Q6P5S2      | UPF0762 protein C6orf58                                       | C6orf58   | 5          | X                        |                       |                                 |                         |
| P11684      | Uteroglobin                                                   | SCGB1A1   | 1          | X                        |                       |                                 | X                       |
| Q709C8      | Vacuolar protein sorting-associated protein 13C               | VPS13C    | 1          |                          |                       |                                 |                         |
| Q9UK41      | Vacuolar protein sorting-associated protein 28 homolog        | VPS28     | 1          |                          | X                     |                                 |                         |

| Accession # | Description                                                    | Gene name | # Peptides | Identified in both pools | Core exosome proteome | Membrane-bound vesicle proteins | Immune-related proteins |
|-------------|----------------------------------------------------------------|-----------|------------|--------------------------|-----------------------|---------------------------------|-------------------------|
| O75083      | WD repeat-containing protein 1                                 | WDR1      | 3          | X                        | X                     |                                 |                         |
| Q6UXB2      | VEGF co-regulated chemokine 1                                  | CXCL17    | 4          | X                        |                       |                                 | X                       |
| Q9UIW0      | Ventral anterior homeobox 2                                    | VAX2      | 1          |                          |                       |                                 |                         |
| P49748      | Very long-chain specific acyl-CoA dehydrogenase, mitochondrial | ACADVL    | 1          |                          |                       |                                 |                         |
| Q9BV40      | Vesicle-associated membrane protein 8                          | VAMP8     | 2          | X                        |                       | X                               | X                       |
| P02774      | Vitamin D-binding protein                                      | GC        | 3          | X                        |                       |                                 | X                       |
| P07225      | Vitamin K-dependent protein S                                  | PROS1     | 2          | X                        |                       | X                               | X                       |
| P04004      | Vitronectin                                                    | VTN       | 1          |                          |                       |                                 | X                       |
| Q6PCB0      | von Willebrand factor A domain-containing protein 1            | VWA1      | 2          | X                        |                       |                                 |                         |
| Q9BRH9      | Zinc finger protein 251                                        | ZNF251    | 1          |                          |                       |                                 |                         |
| O75373      | Zinc finger protein 737                                        | ZNF737    | 1          |                          |                       |                                 |                         |
| P25311      | Zinc-alpha-2-glycoprotein                                      | AZGP1     | 3          | X                        |                       |                                 |                         |
| Q96DA0      | Zymogen granule protein 16 homolog B                           | ZG16B     | 4          | X                        |                       |                                 |                         |
